# Supplementary material for: The Economic Impact of National Essential Public Health Service Package for Hypertension and Type-2 Diabetes: A Retrospective Province-wide Study in China
Source: Research Square preprint supplement (doi:10.21203/rs.3.rs-8180914/v1), 2025-12-12
Supplement: Supplementary file 1 [file ac724f5a4a17f8fd4592bfca.docx]

**Supplemental Materials**

**Number of tables:** 4

**Number of figures:** 1

**Title of tables:**

Table S1. Types of services included in the NEPHSP in 2025

Table S2. Distribution of Institutions and Medical Records by County in Henan Province, China (2022-2024)

Table S3. Keyword-Based Fuzzy Matching for Hypertension and Type 2 Diabetes Mellitus

Table S4. Comorbidities of Hypertension and Type 2 Diabetes Mellitus

Table S5. Cohort sizes after 1:1 propensity score matching for the sensitivity analysis incorporating socioeconomic indicators (insurance type and occupation)

Table S6. Sensitivity Analysis of Medical Cost Comparison – Results from a model including socioeconomic indicators (insurance type and occupation) for patients with Hypertension in Henan Province, China (2022-2024)

Table S7. Sensitivity Analysis of Medical Cost Comparison – Results from a model including socioeconomic indicators (insurance type and occupation) for patients with Type-2 diabetes in Henan Province, China (2022-2024)

Table S8. Sensitivity Analysis of Medical Cost Comparison – Results from a model including socioeconomic indicators (insurance type and occupation) for patients with Both Conditions in Henan Province, China (2022-2024)

**Title of figures:**

Figure S1. The participant flowchart

**Supplementary Table 1 Types of services included in the NEPHSP in 2025**

| **Types** | **Target Population** | **Service Content** |
| --- | --- | --- |
| Establishing Resident Health Records (Implemented since 2009) | Permanent residents within the jurisdiction, including non-local residents living there for over 6 months | (1) Establishing resident health records; (2) Maintenance and management of resident health records. |
| Health Education (Implemented since 2009) | Permanent residents within the jurisdiction | (1) Providing health education materials; (2) Setting up health education bulletin boards; (3) Conducting public health consultation services; (4) Organizing health knowledge lectures; (5) Providing individualized health education. |
| Vaccination (Implemented since 2009) | Children aged 0-6 years and other key populations within the jurisdiction | (1) Vaccination management; (2) Vaccination administration; (3) Management of suspected adverse reactions following immunization. |
| Child Health Management (Implemented since 2009) | Permanent resident children aged 0-6 years within the jurisdiction | (1) Newborn home visits; (2) One-month health management for newborns; (3) Health management for infants and toddlers; (4) Health management for preschool children. |
| Maternal Health Management (Implemented since 2009) | Permanent resident pregnant and postpartum women within the jurisdiction | (1) Early pregnancy health management; (2) Mid-pregnancy health management; (3) Late pregnancy health management; (4) Postpartum home visits; (5) Health checkup at 42 days postpartum. |
| Elderly Health Management (Implemented since 2009) | Permanent residents aged 65 years and above within the jurisdiction | (1) Assessment of lifestyle and health status; (2) Physical examination; (3) Auxiliary examinations; (4) Health guidance. |
| Chronic Disease Patient Health Management (Implemented since 2009) | Permanent residents aged 35 years and above within the jurisdiction diagnosed with essential hypertension or type 2 diabetes | (1) Case finding; (2) Follow-up assessment and classification intervention; (3) Health checkups. |
| Severe Mental Disorders Management (Implemented since 2009) | Permanent residents within the jurisdiction with a clear diagnosis of severe mental disorder living at home | (1) Patient information management; (2) Follow-up assessment and classification intervention; (3) Health checkups. |
| Tuberculosis Patient Health Management (Implemented since 2015) | Permanent residents within the jurisdiction diagnosed with tuberculosis | (1) Screening and referral; (2) First home follow-up visit; (3) Medication supervision and follow-up management; (4) Case closure assessment. |
| Traditional Chinese Medicine (TCM) Health Management (Implemented since 2013) | Permanent residents aged 65 years and above, and children aged 0-36 months within the jurisdiction | (1) TCM constitution identification for the elderly; (2) TCM health regimen for children. |
| Reporting and Handling of Infectious Diseases & Public Health Emergencies (Implemented since 2009) | Population served within the jurisdiction | (1) Risk management for infectious disease outbreaks and public health emergencies; (2) Detection and registration of infectious diseases and public health emergencies; (3) Reporting of information related to infectious diseases and public health emergencies; (4) Handling of infectious diseases and public health emergencies. |
| Assistance in Health and Family Planning Supervision (Implemented since 2011) | Residents within the jurisdiction | (1) Reporting of foodborne diseases and related information; (2) Inspection of drinking water hygiene and safety; (3) School health services; (4) Reporting information on illegal medical practice and illegal blood collection/supply; (5) Reporting family planning related information. |

**Supplementary Table 2 Distribution of Institutions and Medical Records by County in Henan Province, China (2022-2024)**

| **Regions** | **Counties** | **Institutions** | **Records** |
| --- | --- | --- | --- |
| Eastern | 2 | 77 | 1,227,610 |
| Western | 2 | 65 | 1,057,288 |
| Southern | 2 | 58 | 779,804 |
| Northern | 3 | 76 | 1,480,088 |
| Central | 2 | 63 | 912,064 |
| Total | 11 | 339 | 5,456,854 |


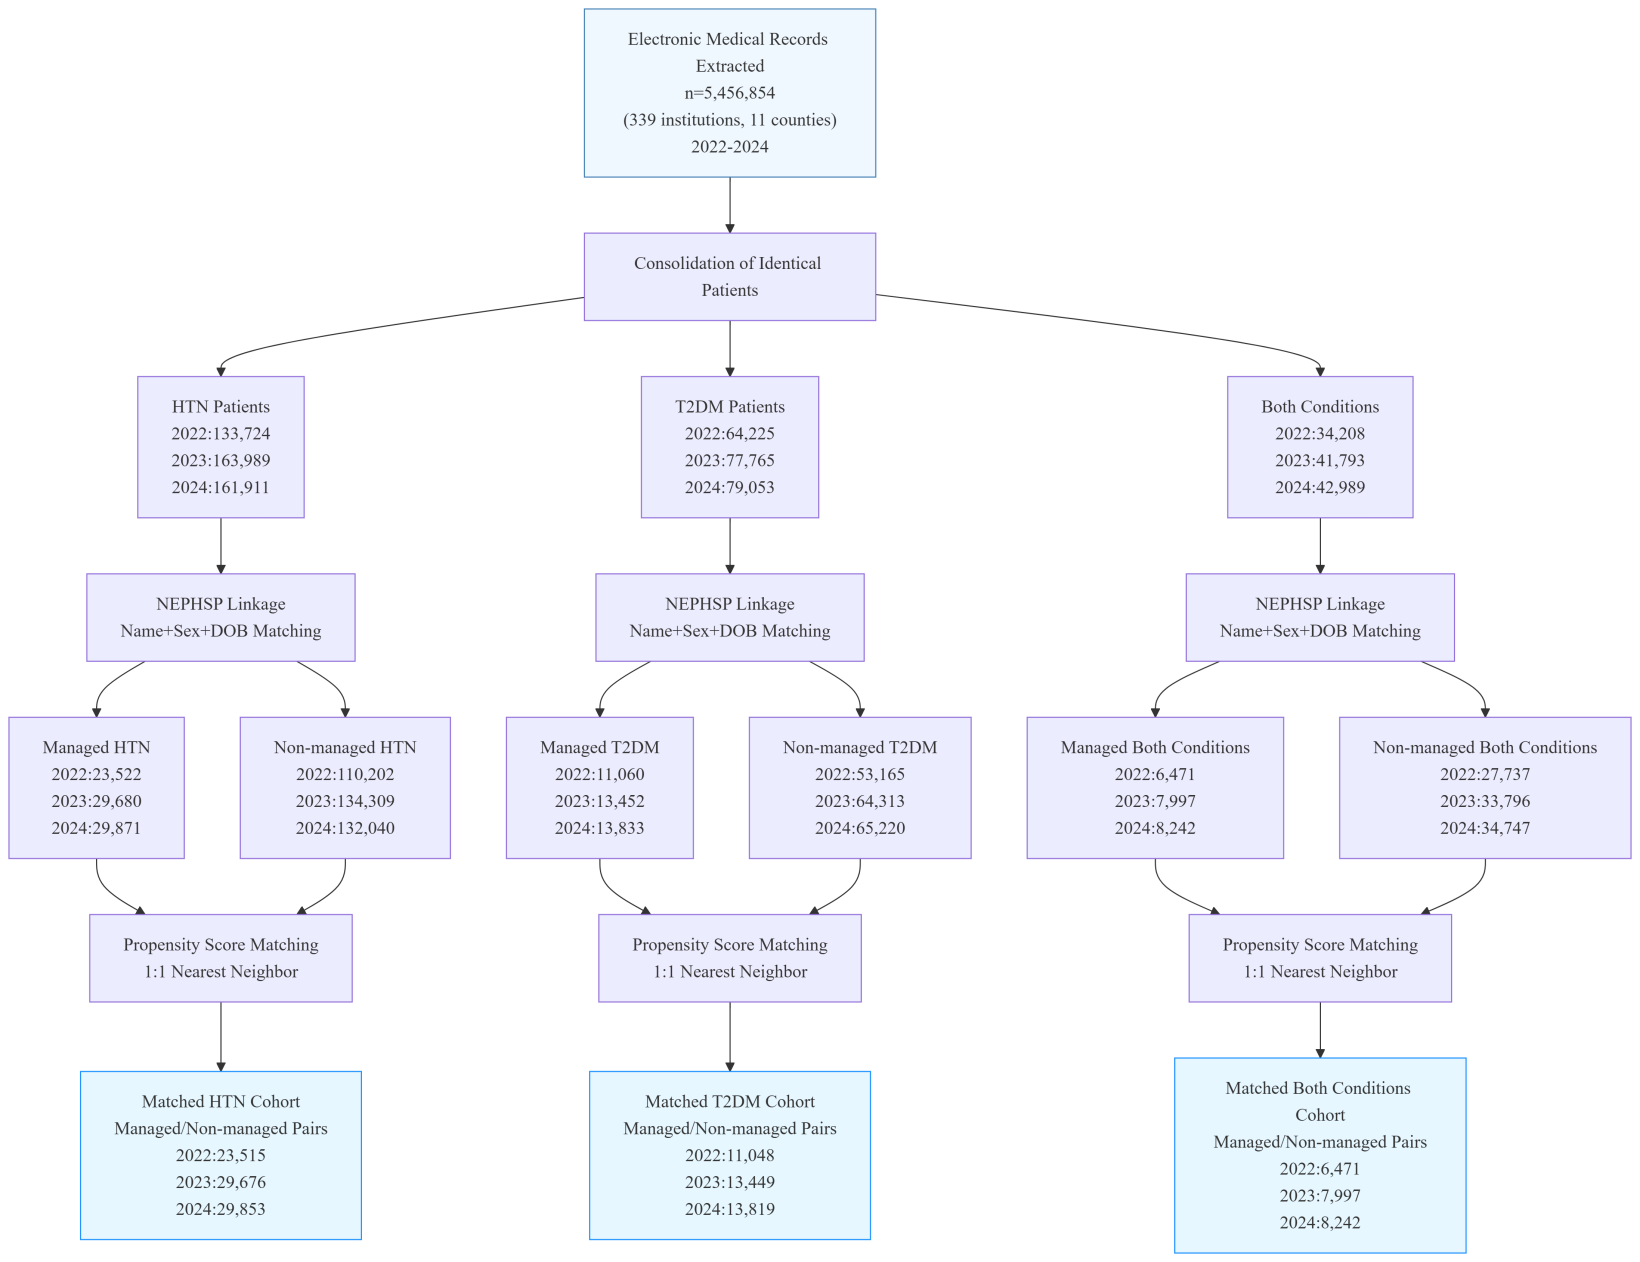


**Supplementary Figure 1 The participant flowchart**

**Supplementary Table 3 Keyword-Based Fuzzy Matching for Hypertension and Type 2 Diabetes Mellitus**

| **ICD-10 Codes** | **keyword-based fuzzy matching** |
| --- | --- |
| Hypertension | High blood pressure; Essential hypertension; High blood pressure; Elevated BP; Uncontrolled BP et al. |
| Type-2 diabetes mellitus | Diabetes type 2; T2DM; Non-insulin dependent; High blood sugar et al. |

**Supplementary Table 4 Comorbidities of Hypertension and Type 2 Diabetes Mellitus**

| **ICD-10 Codes** | **Comorbidities** |
| --- | --- |
| Hypertension | Acute Myocardial Infarction (AMI) [including ST-Segment Elevation Myocardial Infarction (STEMI) and Non-ST-Segment Elevation Myocardial Infarction (NSTEMI)], Heart Failure (HF), Unstable Angina (UA), Acute Coronary Syndrome (ACS), Ischemic Stroke, Hemorrhagic Stroke, Transient Ischemic Attack (TIA), Lacunar Infarction, Cerebral Infarction et al. |
| Type-2 diabetes mellitus | Diabetic Ketoacidosis (DKA), Diabetic Lactic Acidosis, Hyperglycemic Hyperosmolar State (HHS), Diabetic Nephropathy, Diabetic Acute Renal Failure, Diabetic Retinopathy, Diabetic Glaucoma, Diabetic Cataract, Diabetic Iritis, Diabetic Diarrhea, Diabetic Anorectal Dysfunction, Diabetic Esophageal Dysmotility, Diabetic Cystopathy, Diabetic Glomerulosclerosis, Diabetic Proteinuria, Diabetic Foot, Diabetic Neuropathy, Diabetic Coma, Diabetic Arthropathy, Diabetic Gangrene, Diabetic Ulcer, Diabetic Dermopathy, Diabetic Periodontitis, Diabetic Myonecrosis, Diabetic Papillary Necrosis et al. |

**Supplementary Table 5 Cohort sizes after 1:1 propensity score matching for the sensitivity analysis incorporating socioeconomic indicators (insurance type and occupation)**

| **Year** | **Hypertension (HTN)** | **Type 2 Diabetes (T2DM)** | **Both Conditions** |
| --- | --- | --- | --- |
| 2022 | 2,758 | 1,463 | 874 |
| 2023 | 3,677 | 1,844 | 1,102 |
| 2024 | 3,881 | 2,010 | 1,200 |

**Supplementary Table 6 Sensitivity Analysis of Medical Cost Comparison – Results from a model including socioeconomic indicators (insurance type and occupation) for patients with Hypertension in Henan Province, China (2022-2024)**

| **Year** | **Cost Type** | **Sample** | **Managed (Mean)** | **SD*** | **Non-managed**  **(Mean)** | **SD** | **Z** | **P** | **Mean Difference** | **SE Difference** | **95%CI Upper** | **95%CI Lower** |
| --- | --- | --- | --- | --- | --- | --- | --- | --- | --- | --- | --- | --- |
| 2022 | Per Capita Inpatient | 2,758 | 6,033.30 | 7,486.36 | 6,795.75 | 9,543.09 | 3.300 | 0.001 | 762.45 | 231.04 | 309.52 | 1215.37 |
|  | Comprehensive Medical Services | 885.17 | 1,812.48 | 1,139.98 | 2,153.79 | 4.649 | ＜0.001 | 254.81 | 54.81 | 147.36 | 362.27 |
|  | Diagnostic Services | 848.15 | 765.54 | 1,116.18 | 1,106.22 | 9.525 | ＜0.001 | 268.02 | 28.14 | 212.86 | 323.19 |
|  | Treatment Services | 848.01 | 1,317.13 | 1,153.58 | 1,941.78 | 4.940 | ＜0.001 | 305.57 | 61.86 | 184.27 | 426.86 |
|  | Rehabilitation | 520.79 | 885.06 | 394.26 | 966.49 | -1.758 | 0.079 | -126.53 | 71.96 | -267.80 | 14.74 |
|  | TCM Treatment | 258.23 | 338.30 | 593.49 | 1,028.32 | 1.259 | 0.209 | 335.26 | 266.22 | -187.85 | 858.38 |
|  | Western Medicine | 1,191.87 | 1,961.34 | 1,570.08 | 2,190.72 | 6.590 | ＜0.001 | 378.21 | 57.39 | 265.69 | 490.72 |
|  | TCM Medicine | 649.27 | 721.53 | 450.48 | 616.62 | -9.068 | ＜0.001 | -198.79 | 21.92 | -241.77 | -155.81 |
|  | Blood & Blood Products | 1,018.26 | 784.92 | 678.02 | 704.96 | -2.500 | 0.014 | -340.24 | 136.11 | -609.42 | -71.05 |
| 2023 | Per Capita Inpatient | 3,677 | 5,386.74 | 5,985.77 | 6,129.53 | 8,570.22 | 4.309 | ＜0.001 | 742.79 | 172.40 | 404.84 | 1080.75 |
|  | Comprehensive Medical Services | 622.22 | 992.89 | 931.90 | 1,547.90 | 10.174 | ＜0.001 | 309.67 | 30.44 | 250.01 | 369.34 |
|  | Diagnostic Services | 801.94 | 655.40 | 942.48 | 869.40 | 7.617 | ＜0.001 | 140.54 | 18.45 | 104.37 | 176.72 |
|  | Treament Services | 771.74 | 1,250.58 | 1,084.07 | 1,733.63 | 6.293 | ＜0.001 | 312.33 | 49.63 | 215.03 | 409.64 |
|  | Rehabilitation | 535.19 | 985.00 | 302.40 | 982.99 | -3.761 | ＜0.001 | -232.79 | 61.89 | -354.22 | -111.35 |
|  | TCM Treatment | 263.52 | 335.79 | 580.47 | 964.19 | 4.229 | ＜0.001 | 316.95 | 74.96 | 169.85 | 464.05 |
|  | Western Medicine | 845.85 | 1,090.83 | 1,278.21 | 1,630.81 | 13.239 | ＜0.001 | 432.36 | 32.66 | 368.34 | 496.38 |
|  | TCM Medicine | 622.63 | 678.98 | 467.10 | 586.16 | -9.080 | ＜0.001 | -155.53 | 17.13 | -189.11 | -121.95 |
|  | Blood & Blood Products | 958.35 | 690.48 | 715.85 | 728.83 | -1.664 | 0.099 | -242.50 | 145.71 | -530.90 | 45.91 |
| 2024 | Per Capita Inpatient | 3,881 | 4,916.40 | 4,974.60 | 5,540.67 | 6,788.23 | 4.621 | ＜0.001 | 624.27 | 135.10 | 359.44 | 889.11 |
|  | Comprehensive Medical Services | 528.80 | 1,120.00 | 985.82 | 1,725.30 | 13.815 | ＜0.001 | 457.02 | 33.08 | 392.17 | 521.86 |
|  | Diagnostic Services | 739.73 | 588.14 | 878.38 | 786.43 | 8.664 | ＜0.001 | 138.65 | 16.00 | 107.28 | 170.02 |
|  | Treament Services | 764.03 | 1,430.17 | 1,172.73 | 1,991.27 | 7.655 | ＜0.001 | 408.70 | 53.39 | 304.02 | 513.38 |
|  | Rehabilitation | 404.20 | 663.05 | 278.95 | 821.80 | -2.640 | 0.008 | -125.25 | 47.45 | -218.34 | -32.15 |
|  | TCM Treatment | 276.19 | 333.20 | 592.67 | 956.60 | 4.386 | ＜0.001 | 316.49 | 72.15 | 174.92 | 458.05 |
|  | Western Medicine | 667.77 | 876.62 | 966.61 | 1,278.78 | 11.951 | ＜0.001 | 298.83 | 25.01 | 249.82 | 347.85 |
|  | TCM Medicine | 532.76 | 521.50 | 397.05 | 462.60 | -10.580 | ＜0.001 | -135.71 | 12.83 | -160.86 | -110.57 |
|  | Blood & Blood Products | 1,002.65 | 716.91 | 628.97 | 890.79 | -2.155 | 0.033 | -373.68 | 173.42 | -716.43 | -30.92 |

*SD (Standard Deviation) measures the dispersion, variability, or spread of a set of data points relative to their mean (average).

**Supplementary Table 7 Sensitivity Analysis of Medical Cost Comparison – Results from a model including socioeconomic indicators (insurance type and occupation) for patients with Type-2 diabetes in Henan Province, China (2022-2024)**

| **Year** | **Cost Type** | **Sample** | **Managed (Mean)** | **SD** | **Non-managed**  **(Mean)** | **SD** | **Z** | **P** | **Mean Difference** | **SE Difference** | **95%CI Upper** | **95%CI Lower** |
| --- | --- | --- | --- | --- | --- | --- | --- | --- | --- | --- | --- | --- |
| 2022 | Per Capita Inpatient | 2,758 | 6,123.24 | 5,549.15 | 6,749.11 | 8,650.98 | 2.328 | 0.020 | 625.87 | 268.81 | 98.78 | 1152.95 |
|  | Comprehensive Medical Services | 922.42 | 1,520.26 | 1,176.82 | 1,787.37 | 4.074 | ＜0.001 | 254.39 | 62.44 | 131.96 | 376.83 |
|  | Diagnostic Services | 873.07 | 789.76 | 1,194.15 | 1,023.77 | 8.810 | ＜0.001 | 321.08 | 36.44 | 249.62 | 392.54 |
|  | Treatment Services | 814.80 | 1,118.42 | 1,165.82 | 2,394.65 | 3.723 | ＜0.001 | 351.02 | 94.27 | 166.10 | 535.94 |
|  | Rehabilitation | 359.07 | 804.76 | 272.89 | 641.08 | -1.068 | 0.286 | -86.17 | 80.66 | -244.82 | 72.47 |
|  | TCM Treatment | 424.50 | 388.37 | 524.05 | 893.67 | 0.222 | 0.824 | 99.55 | 448.14 | -782.78 | 981.88 |
|  | Western Medicine | 1,198.03 | 1,303.90 | 1,699.21 | 2,281.20 | 7.197 | ＜0.001 | 501.17 | 69.64 | 364.63 | 637.72 |
|  | TCM Medicine | 637.59 | 628.41 | 389.22 | 568.24 | -9.209 | ＜0.001 | -248.37 | 26.97 | -301.26 | -195.48 |
|  | Blood & Blood Products | 822.78 | 398.98 | 590.28 | 767.21 | -1.457 | 0.149 | -232.49 | 159.52 | -549.78 | 84.80 |
| 2023 | Per Capita Inpatient | 3,677 | 5,517.81 | 4,811.65 | 6,172.41 | 6,759.97 | 3.387 | 0.001 | 654.59 | 193.25 | 275.72 | 1033.47 |
|  | Comprehensive Medical Services | 595.37 | 951.82 | 1,042.91 | 2,169.10 | 8.096 | ＜0.001 | 447.54 | 55.28 | 339.15 | 555.93 |
|  | Diagnostic Services | 804.35 | 647.43 | 1,077.44 | 1,010.25 | 9.527 | ＜0.001 | 273.09 | 28.67 | 216.88 | 329.29 |
|  | Treament Services | 803.15 | 1,214.75 | 1,021.63 | 1,609.87 | 3.510 | ＜0.001 | 218.48 | 62.25 | 96.40 | 340.55 |
|  | Rehabilitation | 509.50 | 1,024.94 | 212.69 | 718.40 | -3.765 | ＜0.001 | -296.80 | 78.83 | -451.67 | -141.94 |
|  | TCM Treatment | 189.42 | 163.19 | 532.61 | 865.21 | 2.406 | 0.017 | 343.20 | 142.65 | 62.75 | 623.64 |
|  | Western Medicine | 877.71 | 996.09 | 1,304.16 | 1,534.79 | 9.916 | ＜0.001 | 426.45 | 43.01 | 342.13 | 510.77 |
|  | TCM Medicine | 590.57 | 583.33 | 419.38 | 569.49 | -7.796 | ＜0.001 | -171.19 | 21.96 | -214.24 | -128.13 |
|  | Blood & Blood Products | 1,013.05 | 780.82 | 733.19 | 695.76 | -1.737 | 0.086 | -279.86 | 161.15 | -599.74 | 40.03 |
| 2024 | Per Capita Inpatient | 3,881 | 5,030.89 | 4,439.16 | 5,822.64 | 9,643.79 | 3.343 | 0.001 | 791.74 | 236.81 | 327.47 | 1256.02 |
|  | Comprehensive Medical Services | 510.74 | 859.67 | 1,056.81 | 3,664.41 | 6.484 | ＜0.001 | 546.07 | 84.22 | 380.96 | 711.18 |
|  | Diagnostic Services | 741.11 | 570.33 | 957.53 | 862.39 | 9.235 | ＜0.001 | 216.42 | 23.44 | 170.47 | 262.37 |
|  | Treament Services | 751.58 | 1,315.10 | 1,132.01 | 1,662.39 | 6.065 | ＜0.001 | 380.43 | 62.73 | 257.41 | 503.44 |
|  | Rehabilitation | 476.66 | 791.83 | 282.53 | 1,039.77 | -2.341 | 0.020 | -194.13 | 82.94 | -357.01 | -31.25 |
|  | TCM Treatment | 301.45 | 277.99 | 508.64 | 753.56 | 1.812 | 0.071 | 207.19 | 114.37 | -17.49 | 431.86 |
|  | Western Medicine | 687.15 | 796.33 | 1,031.85 | 1,541.38 | 8.870 | ＜0.001 | 344.70 | 38.86 | 268.51 | 420.90 |
|  | TCM Medicine | 518.26 | 513.82 | 363.21 | 445.93 | -8.807 | ＜0.001 | -155.05 | 17.61 | -189.57 | -120.53 |
|  | Blood & Blood Products | 1,041.23 | 1,015.91 | 511.69 | 689.42 | -2.816 | 0.006 | -529.54 | 188.05 | -902.91 | -156.17 |

**Supplementary Table 8 Sensitivity Analysis of Medical Cost Comparison – Results from a model including socioeconomic indicators (insurance type and occupation) for patients with Both Conditions in Henan Province, China (2022-2024)**

| **Year** | **Cost Type** | **Sample** | **Managed (Mean)** | **SD** | **Non-managed**  **(Mean)** | **SD** | **Z** | **P** | **Mean Difference** | **SE Difference** | **95%CI Upper** | **95%CI Lower** |
| --- | --- | --- | --- | --- | --- | --- | --- | --- | --- | --- | --- | --- |
| 2022 | Per Capita Inpatient | 2,758 | 6,332.45 | 5,784.42 | 6,255.23 | 7,012.88 | -0.251 | 0.802 | -77.22 | 307.64 | -680.60 | 526.16 |
|  | Comprehensive Medical Services | 928.53 | 1,707.78 | 1,075.18 | 1,485.94 | 1.879 | 0.060 | 146.65 | 78.05 | -6.43 | 299.74 |
|  | Diagnostic Services | 896.23 | 786.84 | 1,180.81 | 938.42 | 6.357 | ＜0.001 | 284.58 | 44.77 | 196.76 | 372.40 |
|  | Treatment Services | 858.62 | 1,196.52 | 1,078.88 | 1,852.95 | 2.135 | 0.033 | 220.26 | 103.14 | 17.82 | 422.70 |
|  | Rehabilitation | 294.90 | 495.54 | 330.74 | 741.10 | 0.368 | 0.713 | 35.84 | 97.37 | -156.19 | 227.86 |
|  | TCM Treatment | —— | —— | 639.96 | 1,129.54 | —— | —— | —— | —— | —— | —— |
|  | Western Medicine | 1,191.10 | 1,252.67 | 1,472.78 | 1,581.28 | 4.092 | ＜0.001 | 281.68 | 68.84 | 146.66 | 416.69 |
|  | TCM Medicine | 639.36 | 603.08 | 392.40 | 521.96 | -7.541 | ＜0.001 | -246.96 | 32.75 | -311.20 | -182.71 |
|  | Blood & Blood Products | 812.67 | 368.99 | 457.37 | 833.18 | -1.489 | 0.142 | -355.30 | 238.68 | -833.44 | 122.84 |
| 2023 | Per Capita Inpatient | 3,677 | 5,751.29 | 4,816.44 | 6,429.24 | 8,045.49 | 2.400 | 0.016 | 677.95 | 282.50 | 123.94 | 1231.95 |
|  | Comprehensive Medical Services | 610.08 | 799.60 | 961.49 | 1,357.86 | 7.390 | ＜0.001 | 351.41 | 47.55 | 258.15 | 444.66 |
|  | Diagnostic Services | 846.88 | 692.30 | 1,046.14 | 878.51 | 5.765 | ＜0.001 | 199.26 | 34.56 | 131.47 | 267.04 |
|  | Treament Services | 799.40 | 1,234.75 | 1,016.70 | 1,472.33 | 2.796 | 0.005 | 217.30 | 77.71 | 64.85 | 369.75 |
|  | Rehabilitation | 521.02 | 1,049.99 | 256.07 | 774.90 | -2.596 | 0.010 | -264.95 | 102.04 | -465.70 | -64.20 |
|  | TCM Treatment | 182.25 | 105.01 | 506.94 | 797.39 | 0.575 | 0.566 | 324.69 | 565.06 | -788.56 | 1437.94 |
|  | Western Medicine | 891.42 | 1,004.87 | 1,337.01 | 1,567.48 | 7.894 | ＜0.001 | 445.59 | 56.45 | 334.89 | 556.29 |
|  | TCM Medicine | 633.79 | 606.04 | 456.87 | 626.93 | -5.912 | ＜0.001 | -176.92 | 29.92 | -235.61 | -118.23 |
|  | Blood & Blood Products | 1,123.00 | 609.12 | 497.92 | 440.20 | -3.332 | 0.002 | -625.08 | 187.58 | -1007.65 | -242.51 |
| 2024 | Per Capita Inpatient | 3,881 | 5,165.66 | 4,214.39 | 5,990.98 | 7,751.57 | 3.240 | 0.001 | 825.33 | 254.70 | 325.87 | 1324.79 |
|  | Comprehensive Medical Services | 497.14 | 917.95 | 998.81 | 1,290.80 | 10.967 | ＜0.001 | 501.67 | 45.74 | 411.97 | 591.37 |
|  | Diagnostic Services | 761.50 | 582.12 | 980.08 | 884.41 | 7.051 | ＜0.001 | 218.58 | 31.00 | 157.79 | 279.37 |
|  | Treament Services | 724.60 | 1,251.07 | 1,149.61 | 1,940.15 | 4.882 | ＜0.001 | 425.01 | 87.06 | 254.23 | 595.79 |
|  | Rehabilitation | 507.71 | 851.02 | 227.15 | 503.47 | -4.141 | ＜0.001 | -280.57 | 67.75 | -413.76 | -147.37 |
|  | TCM Treatment | 411.73 | 402.58 | 530.46 | 904.42 | 0.227 | 0.821 | 118.72 | 523.34 | -911.06 | 1148.51 |
|  | Western Medicine | 680.12 | 781.53 | 1,029.48 | 1,199.83 | 8.430 | ＜0.001 | 349.36 | 41.44 | 268.10 | 430.63 |
|  | TCM Medicine | 548.75 | 511.35 | 387.45 | 471.52 | -7.013 | ＜0.001 | -161.30 | 23.00 | -206.42 | -116.19 |
|  | Blood & Blood Products | 1,021.89 | 887.97 | 372.69 | 553.88 | -2.822 | 0.007 | -649.20 | 230.04 | -1111.97 | -186.43 |
